# Supplementary material for: Data-driven detection of age-related arbitrary monotonic changes in single-cell gene expression distributions
Source: PeerJ journal article supplement (doi:10.7717/peerj.16851), 2024-02-08
Supplement: supp1.pdf [file supp1.pdf]

correlation coefficient

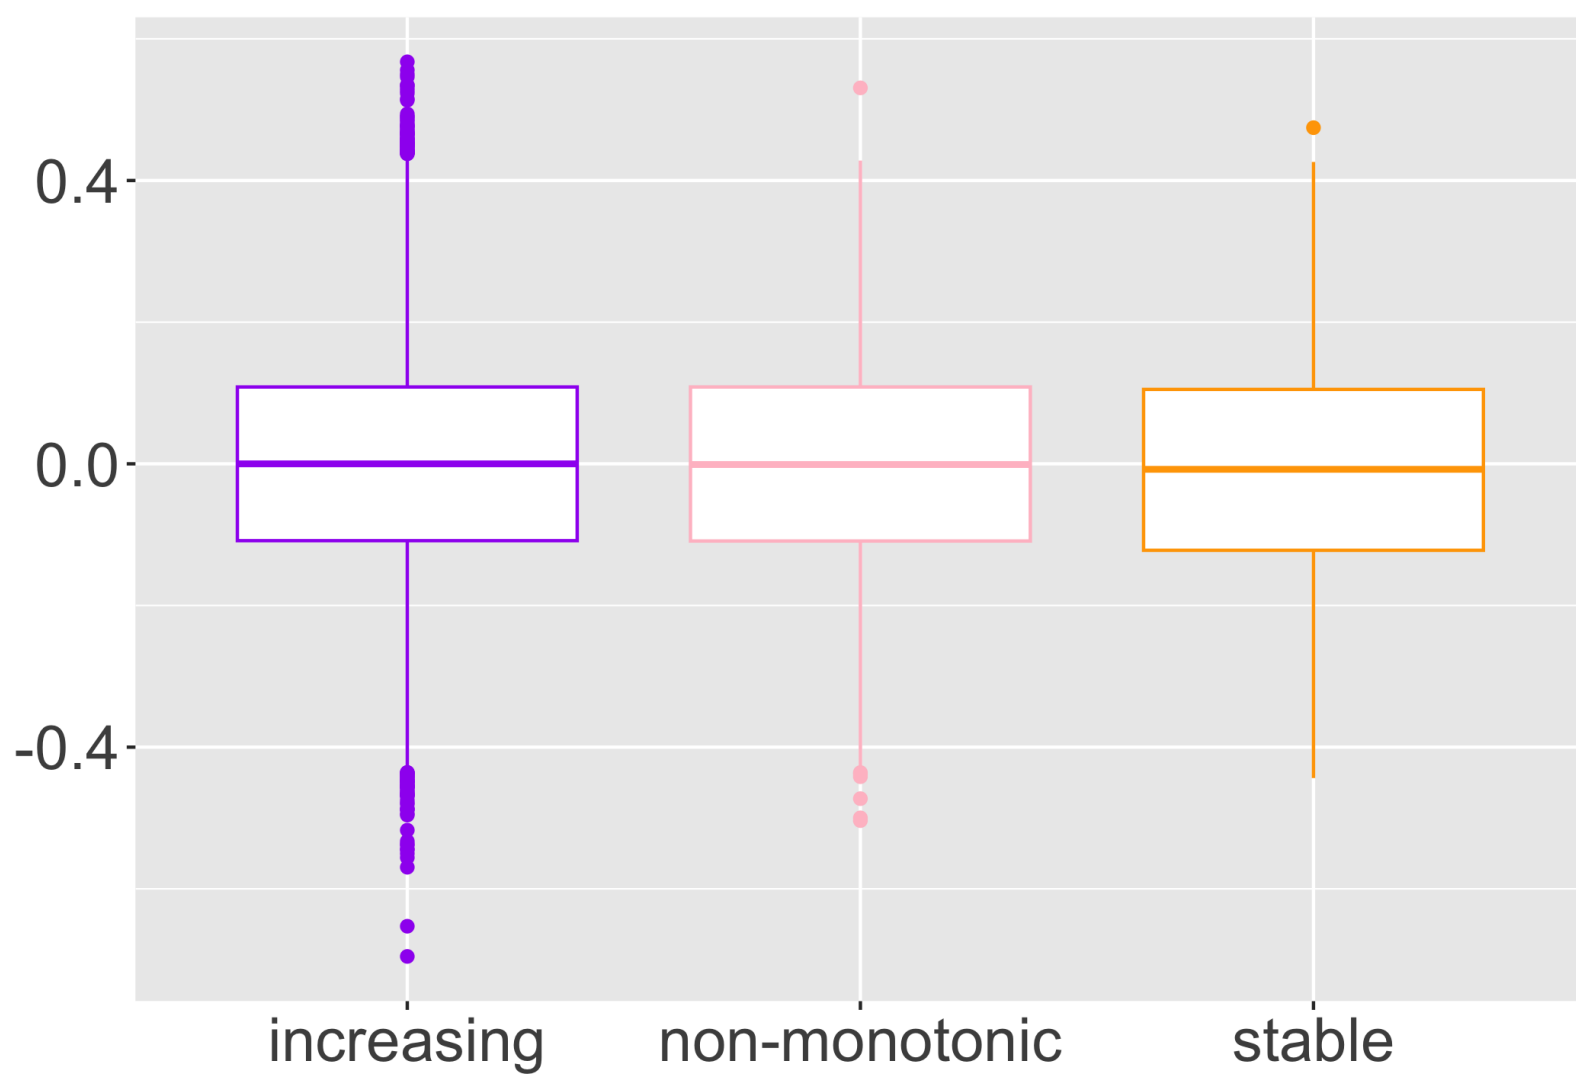

group

- increasing
- non-monotonic
- stable
