# Supplementary material for: Data-driven detection of age-related arbitrary monotonic changes in single-cell gene expression distributions
Source: PeerJ journal article supplement (doi:10.7717/peerj.16851), 2024-02-08

(A)

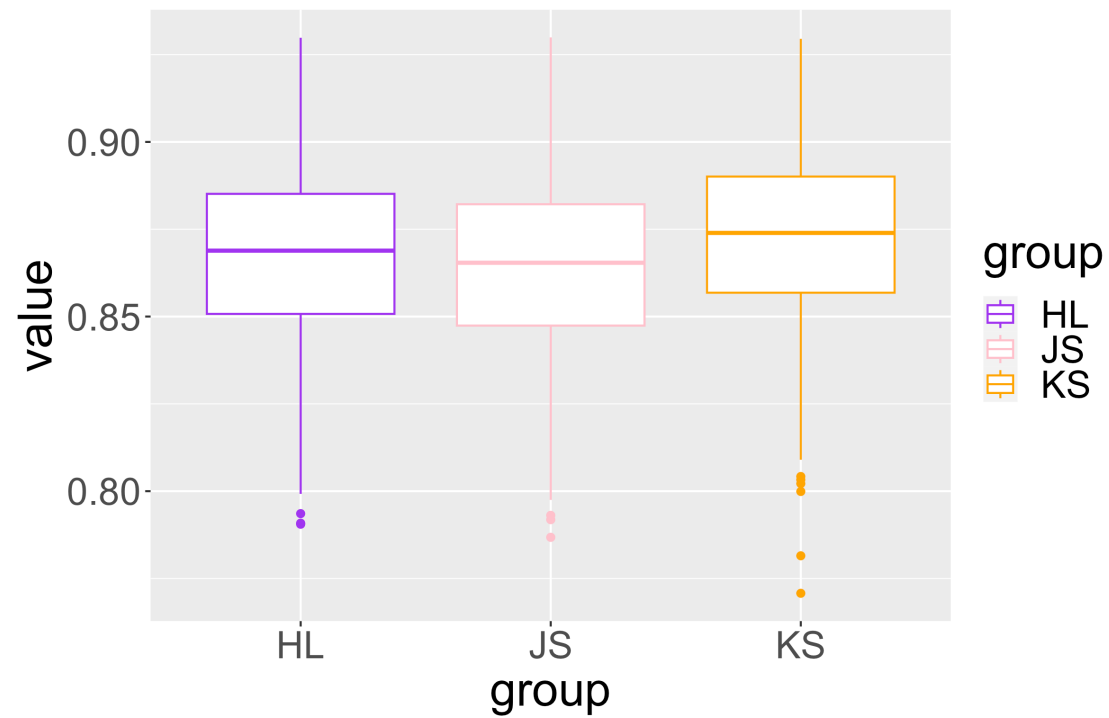

(B)

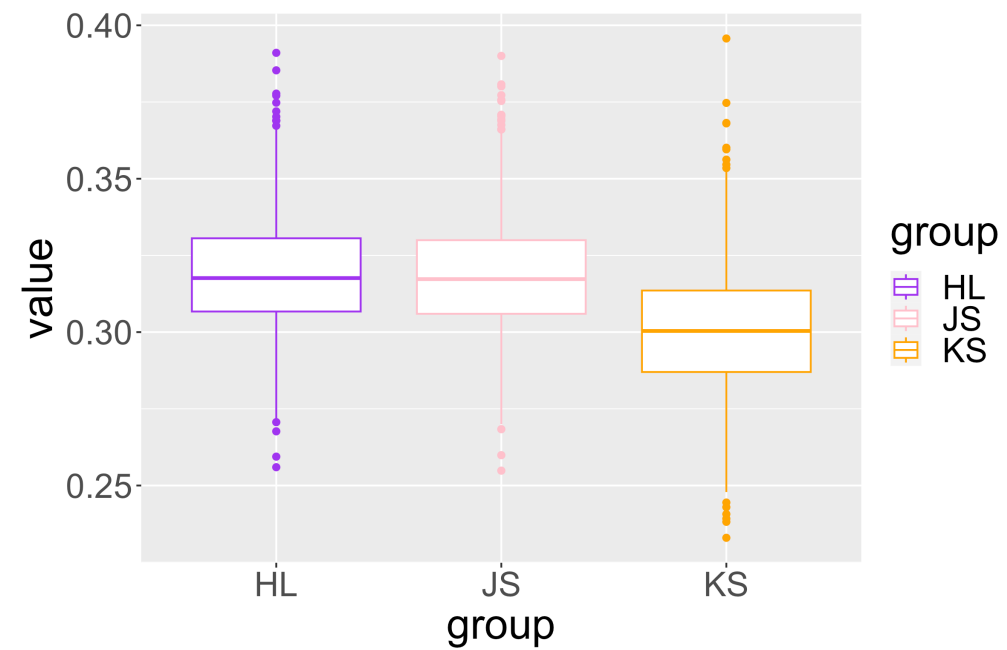

(C)

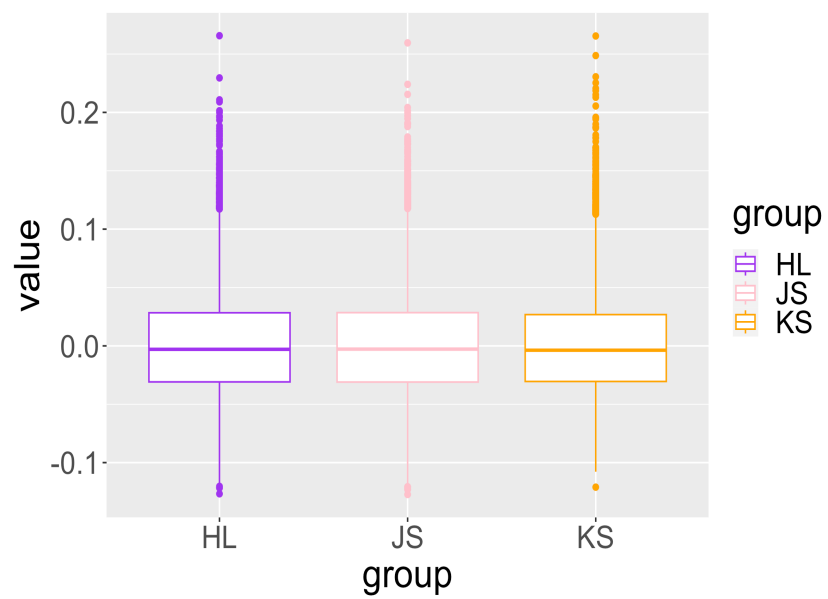

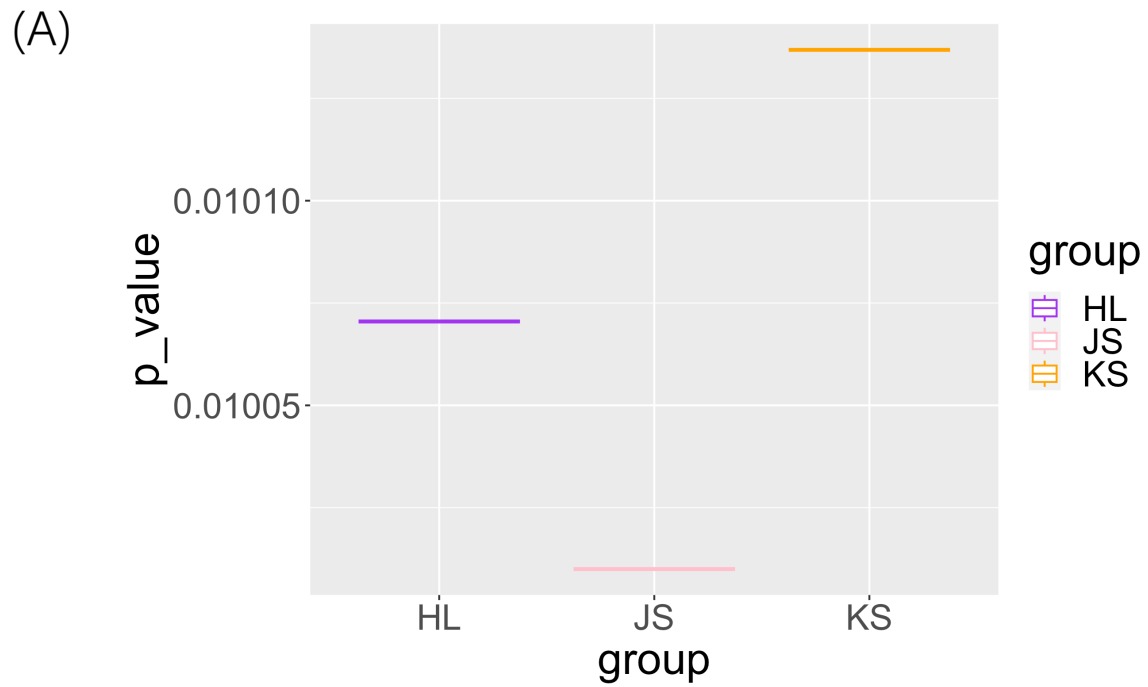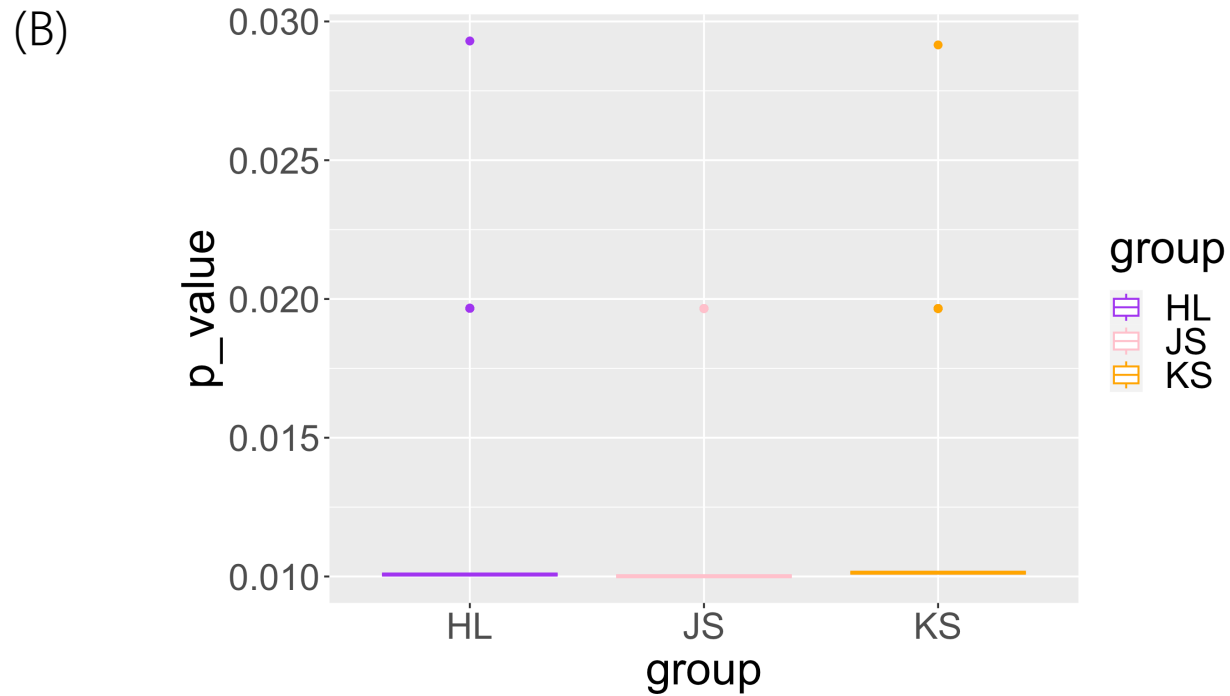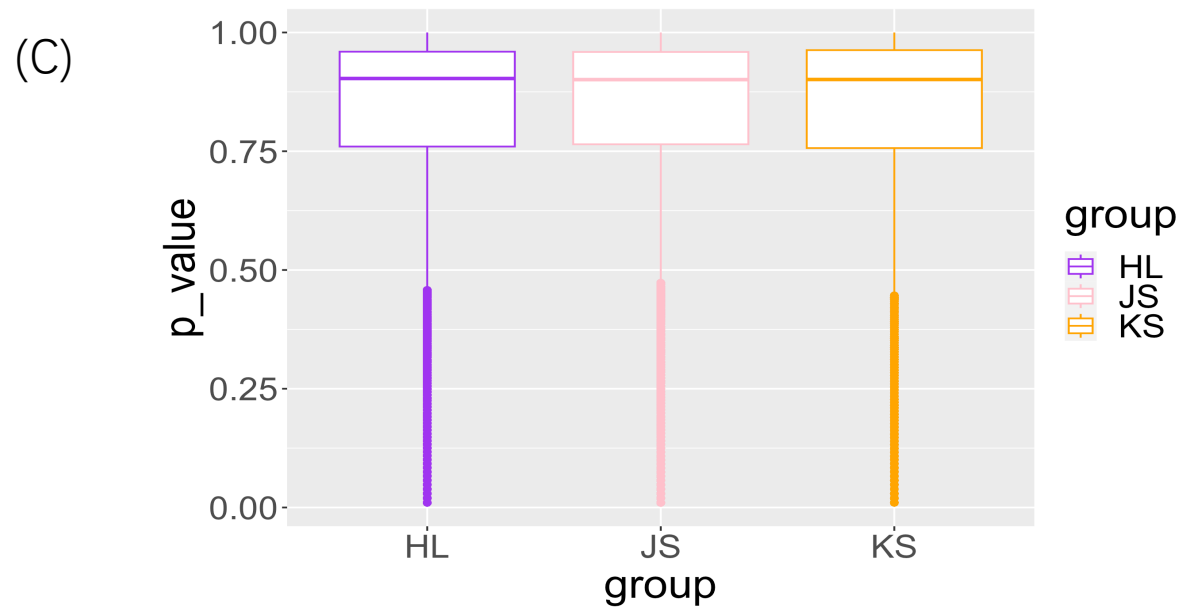

Supplement: supp2.pdf [file supp2.pdf]
