# Supplementary material for: Data-driven detection of age-related arbitrary monotonic changes in single-cell gene expression distributions
Source: PeerJ journal article supplement (doi:10.7717/peerj.16851), 2024-02-08

# Acot9(Limb\_Muscle)

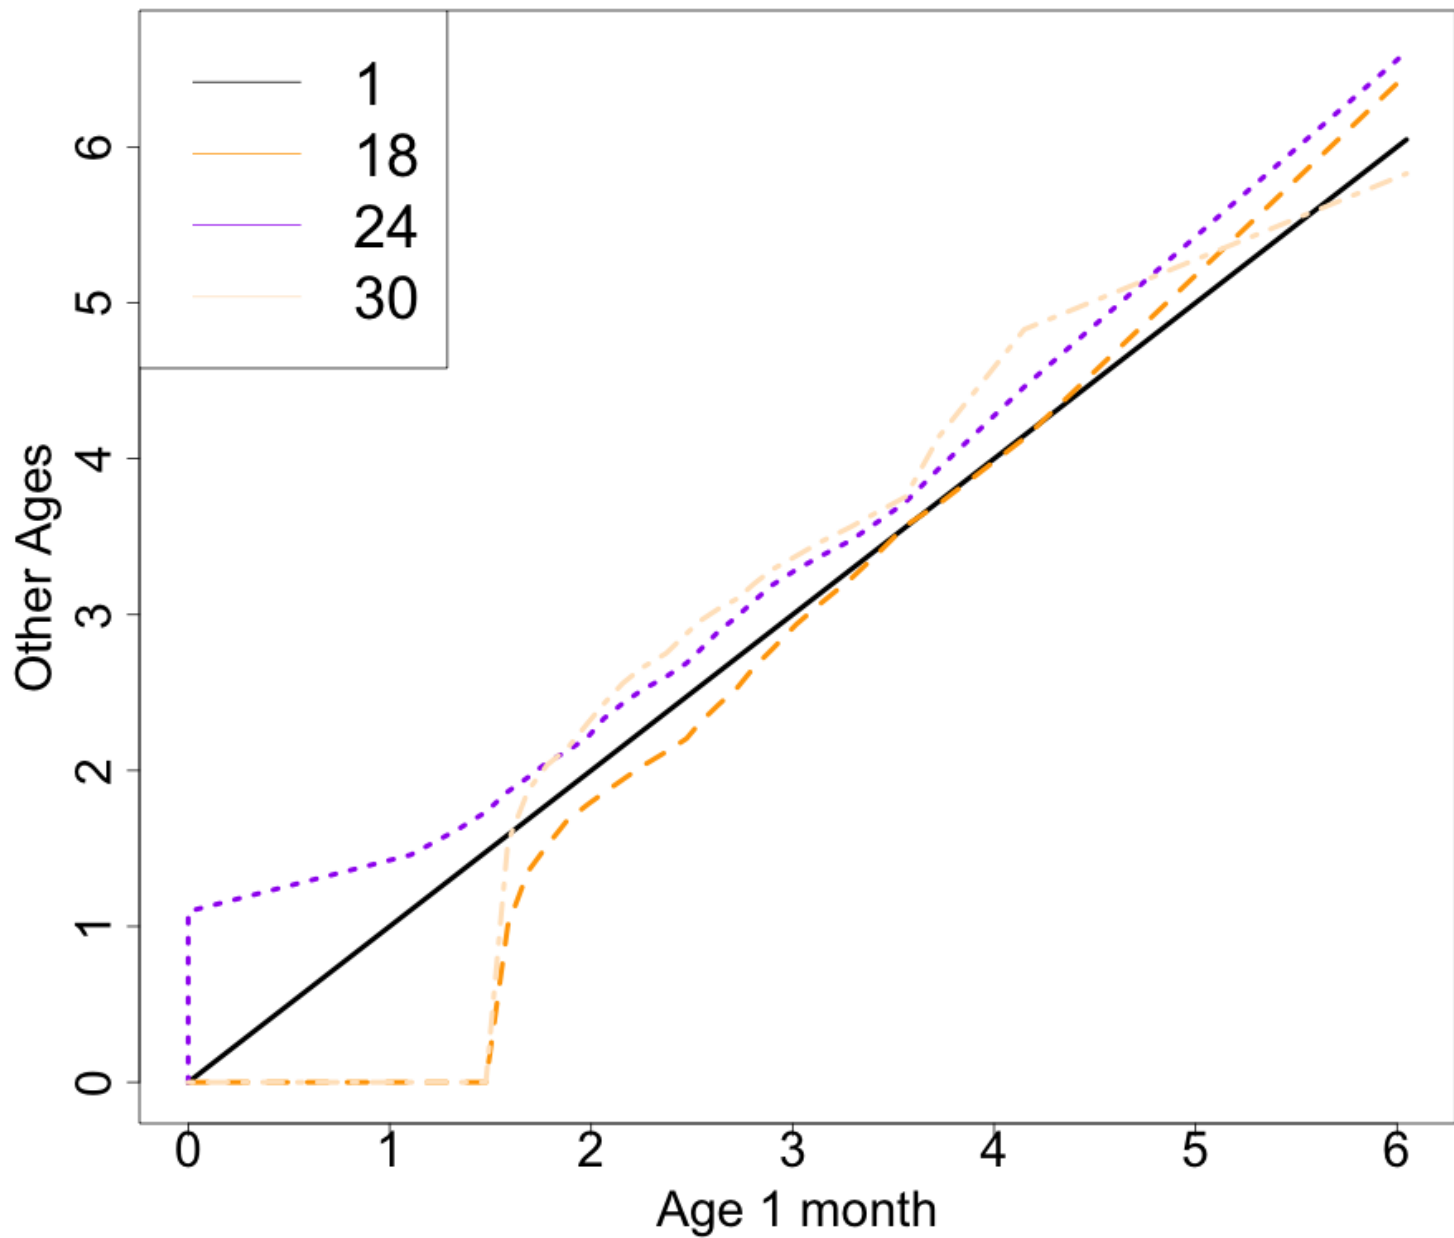

# AI607873(Limb\_Muscle)

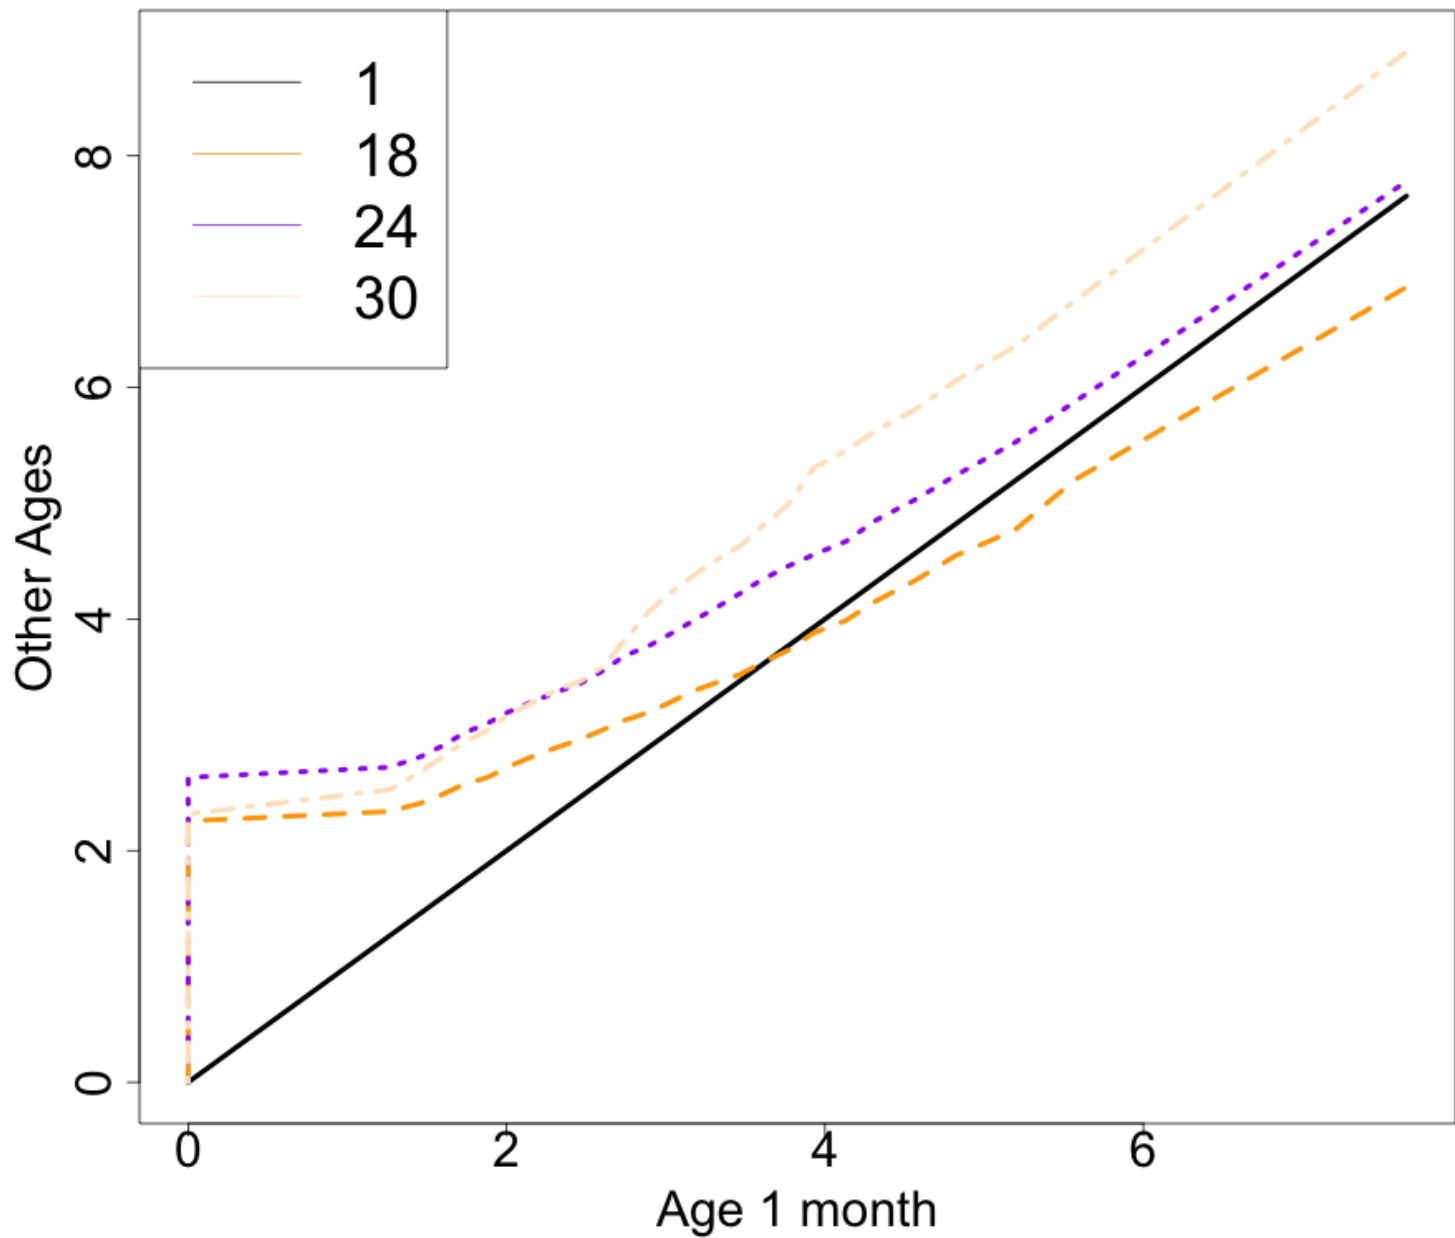

# Grb10(Limb\_Muscle)

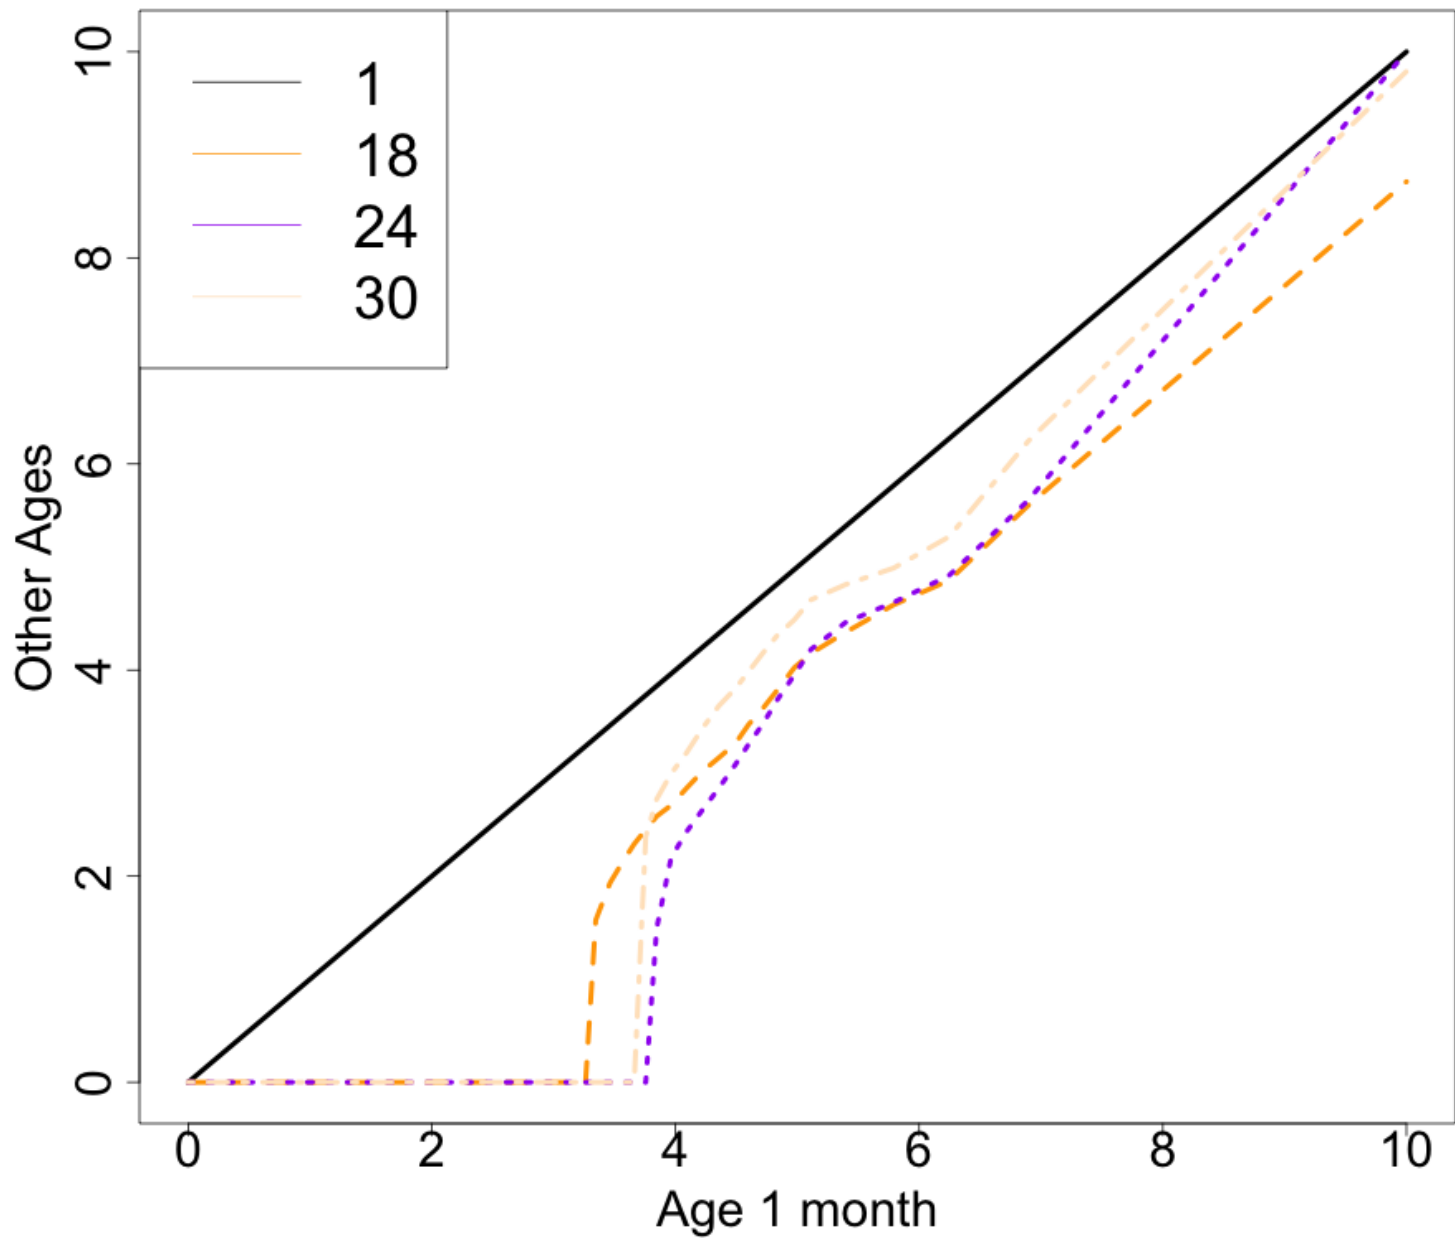

# Gt(ROSA)26Sor(Limb\_Muscle)

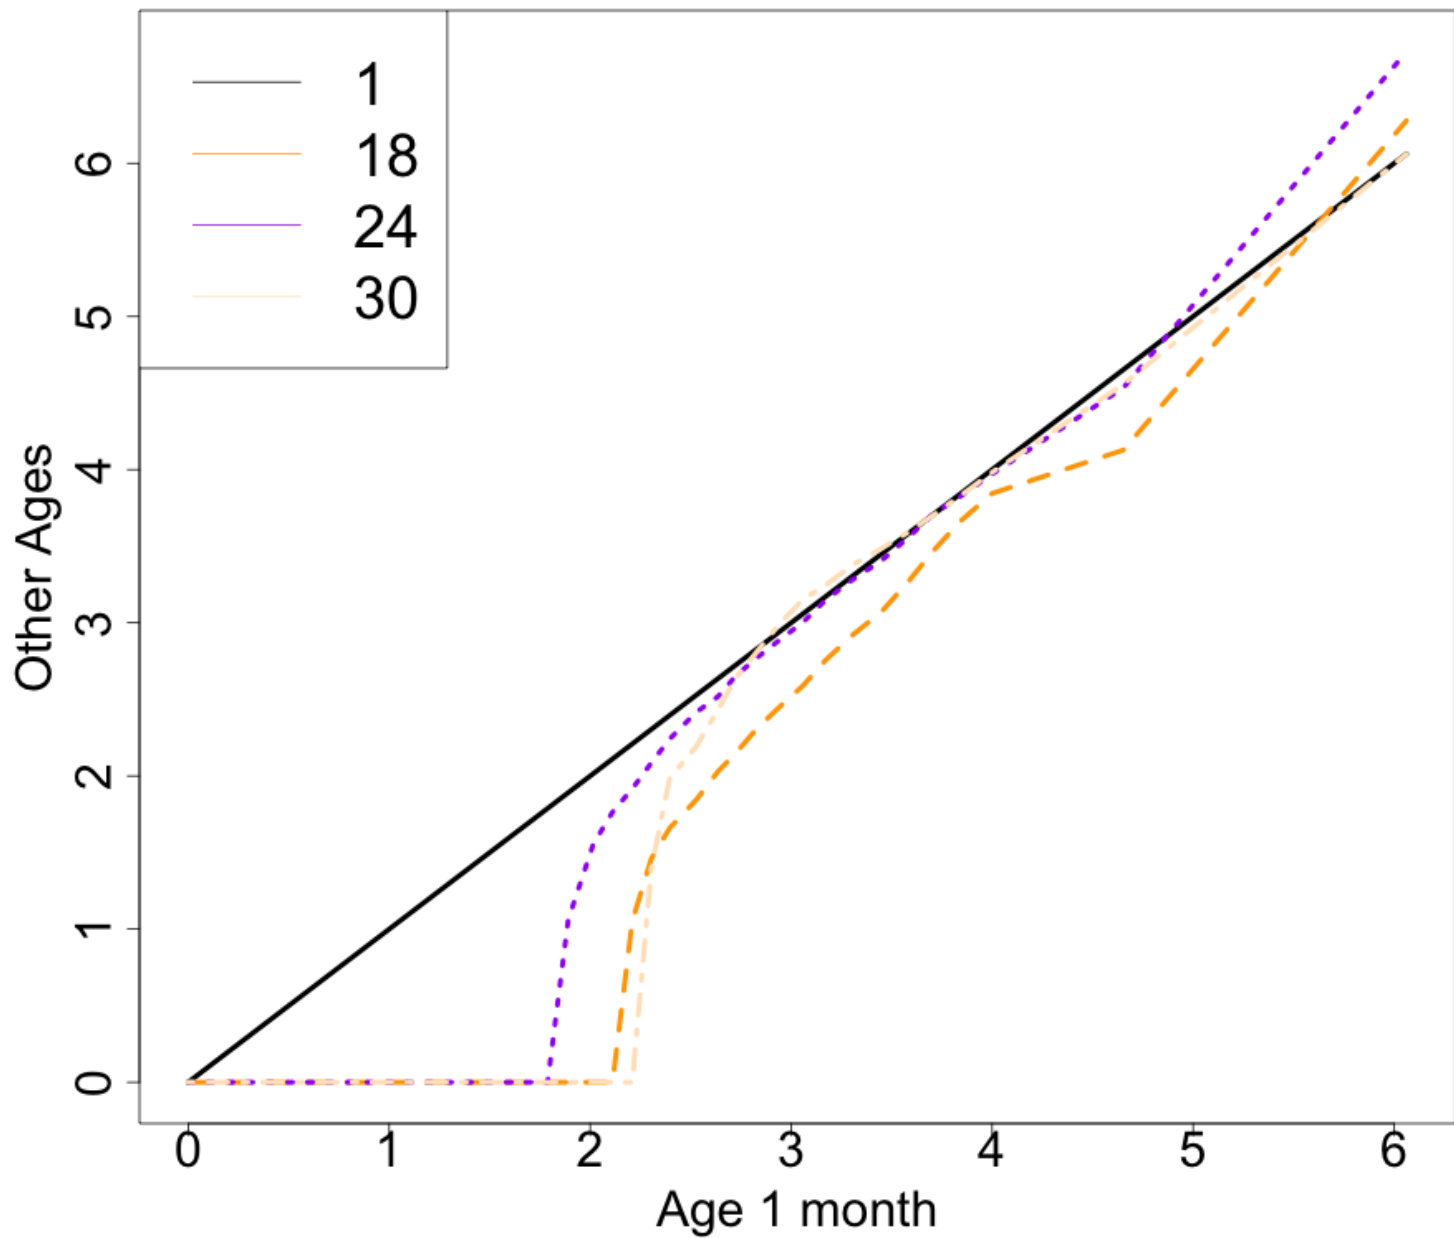

# Jmjd6(Limb\_Muscle)

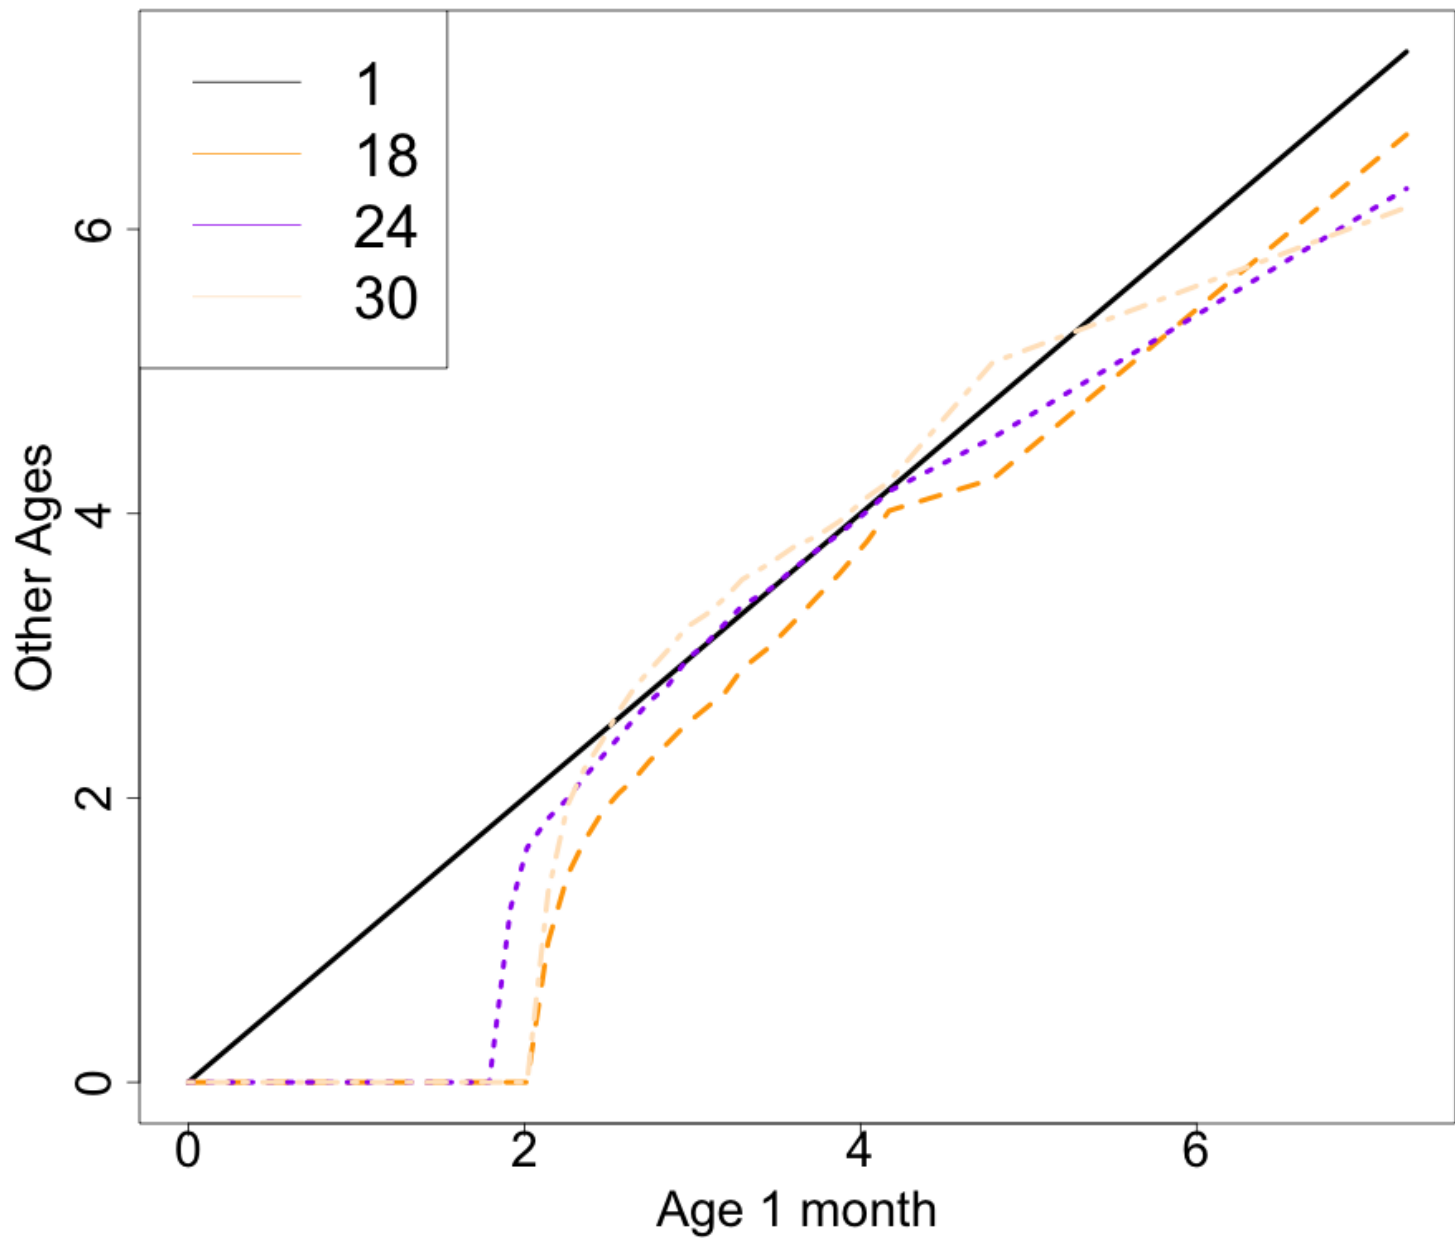

# Nr1d2(Limb\_Muscle)

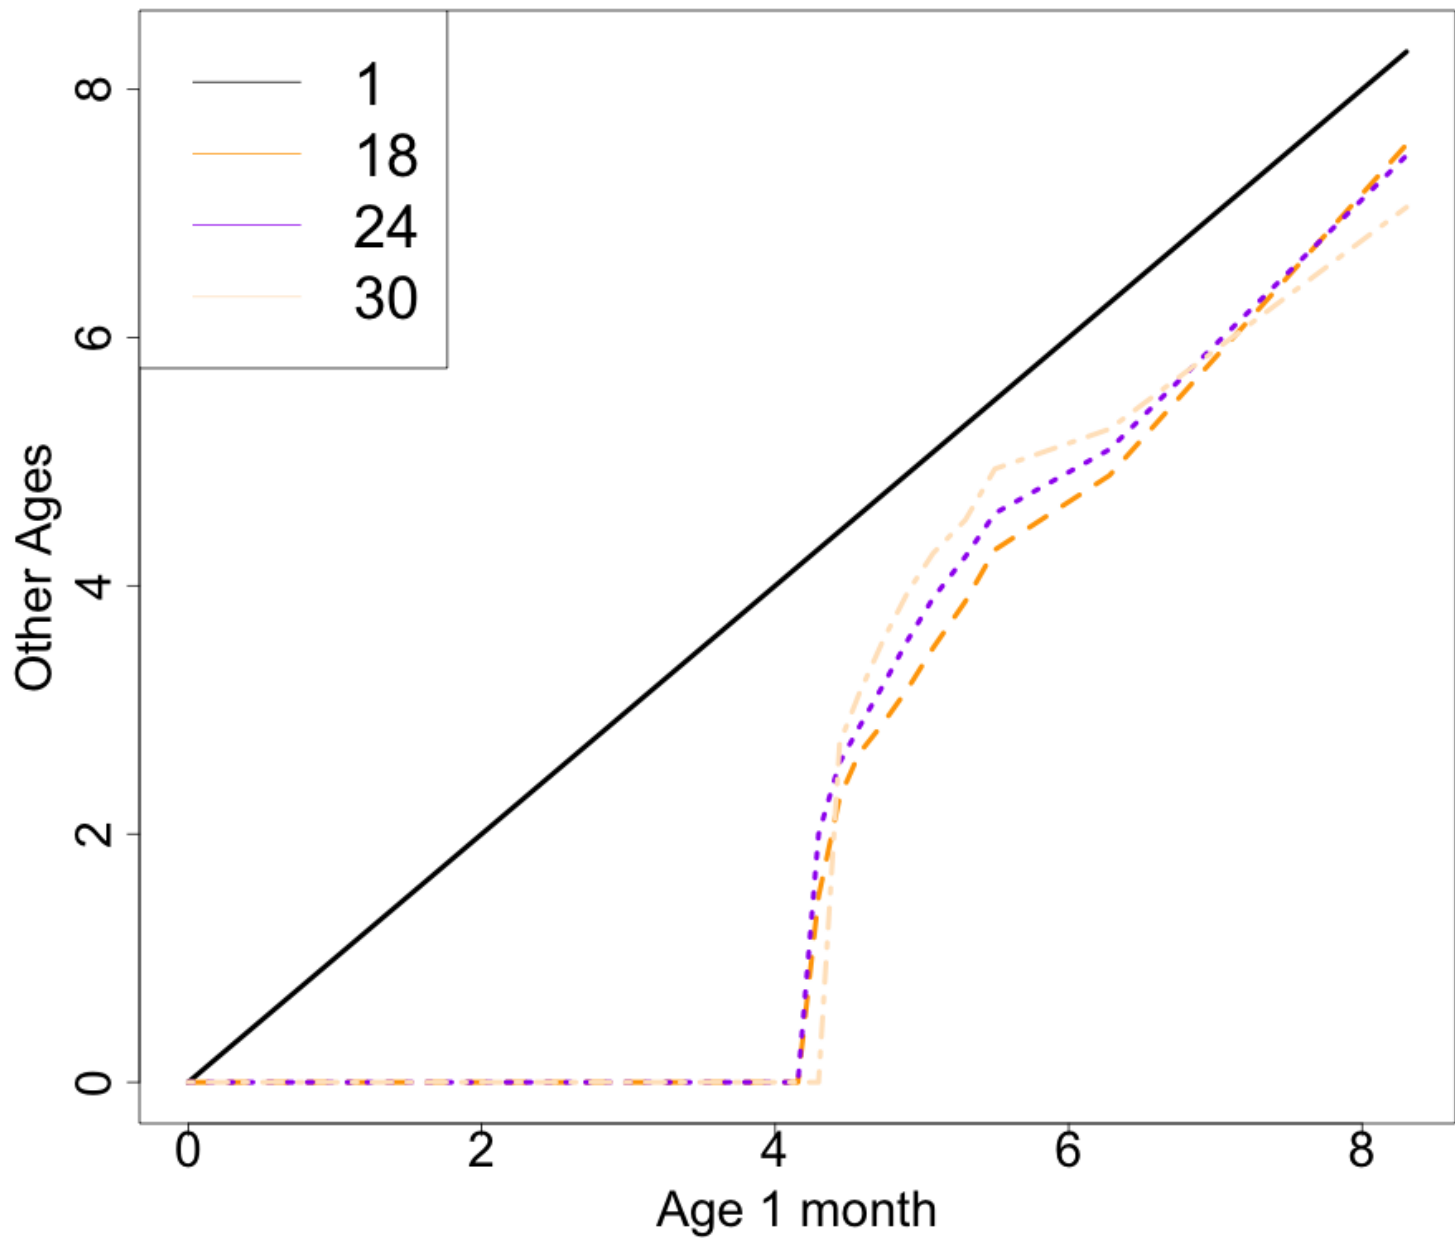

# Plac9(Limb\_Muscle)

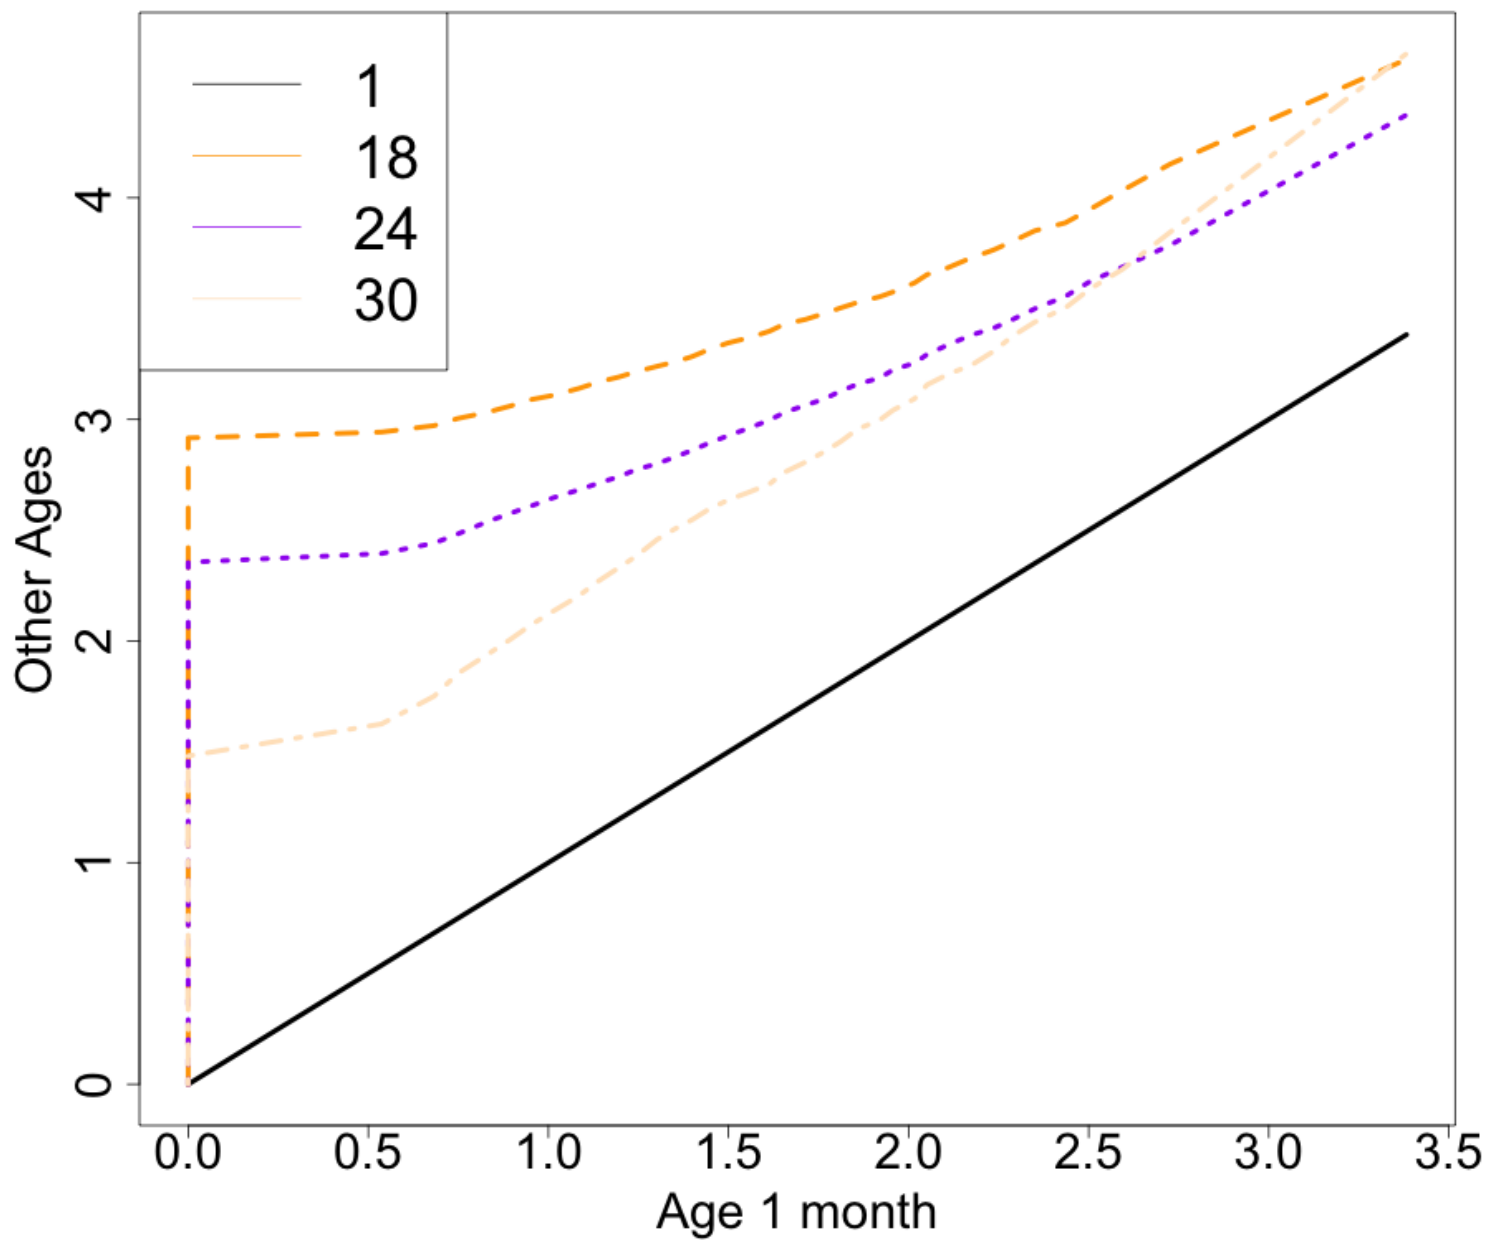

# Plscr1(Limb\_Muscle)

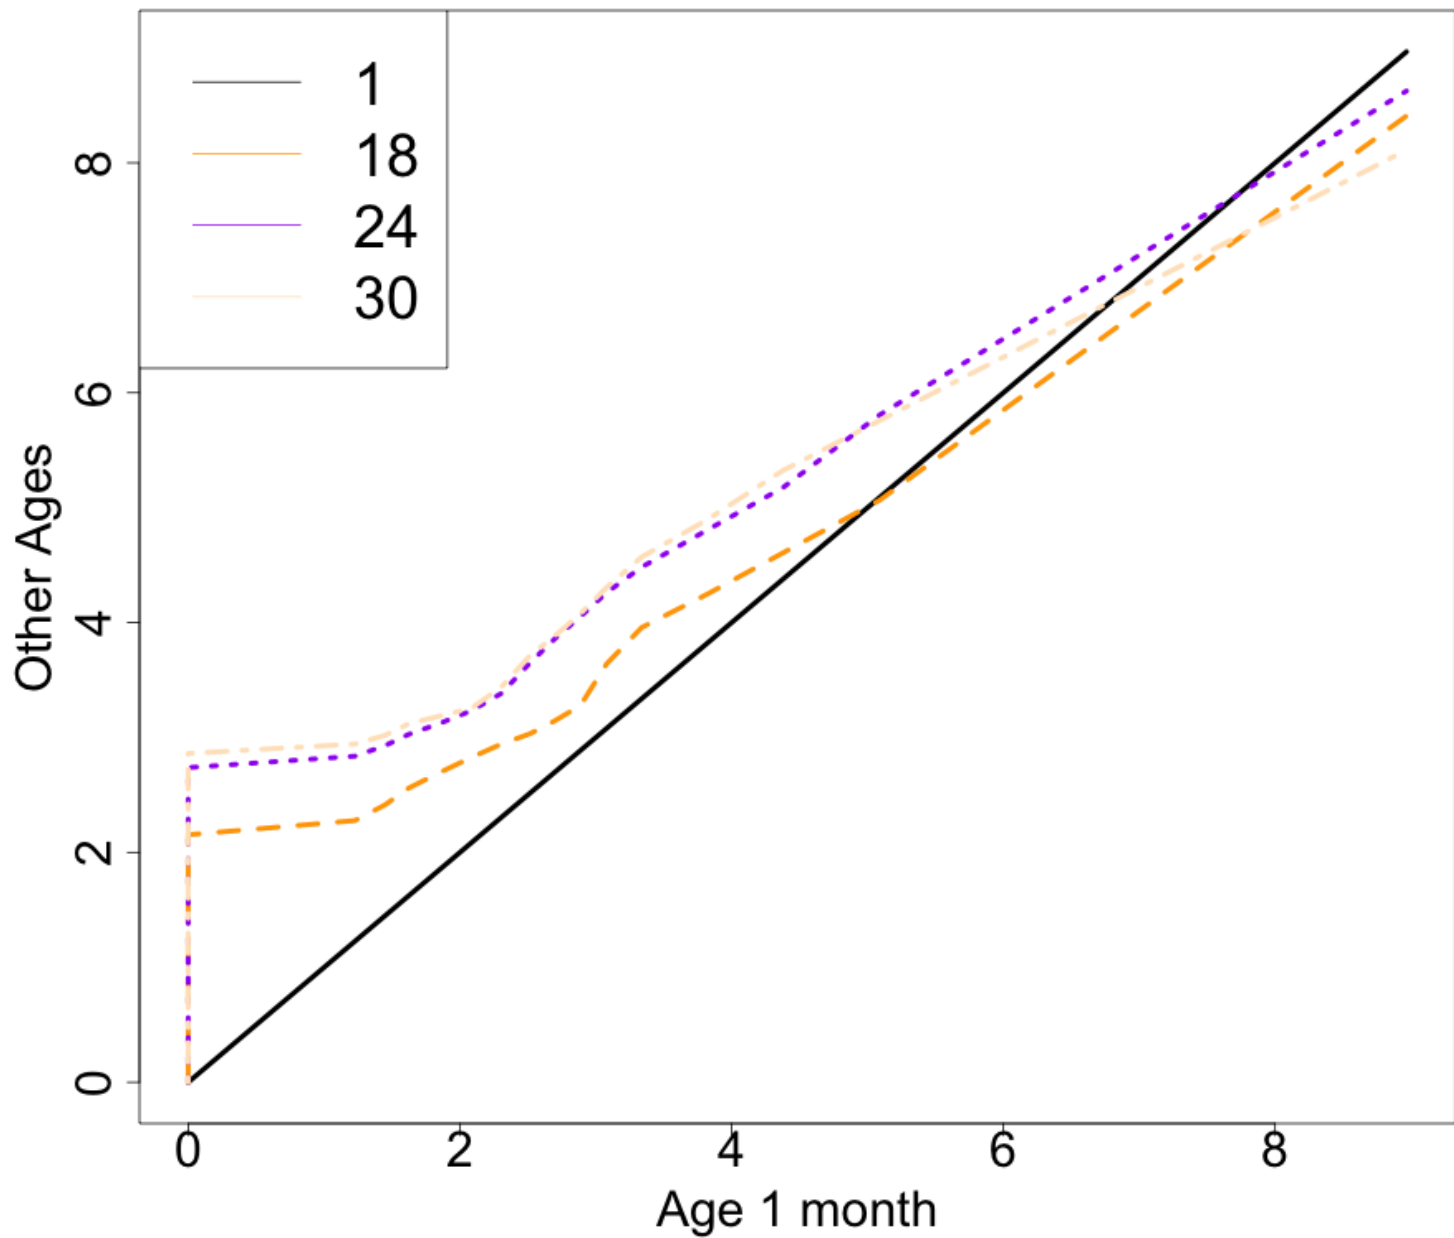



Six1(Limb\_Muscle)

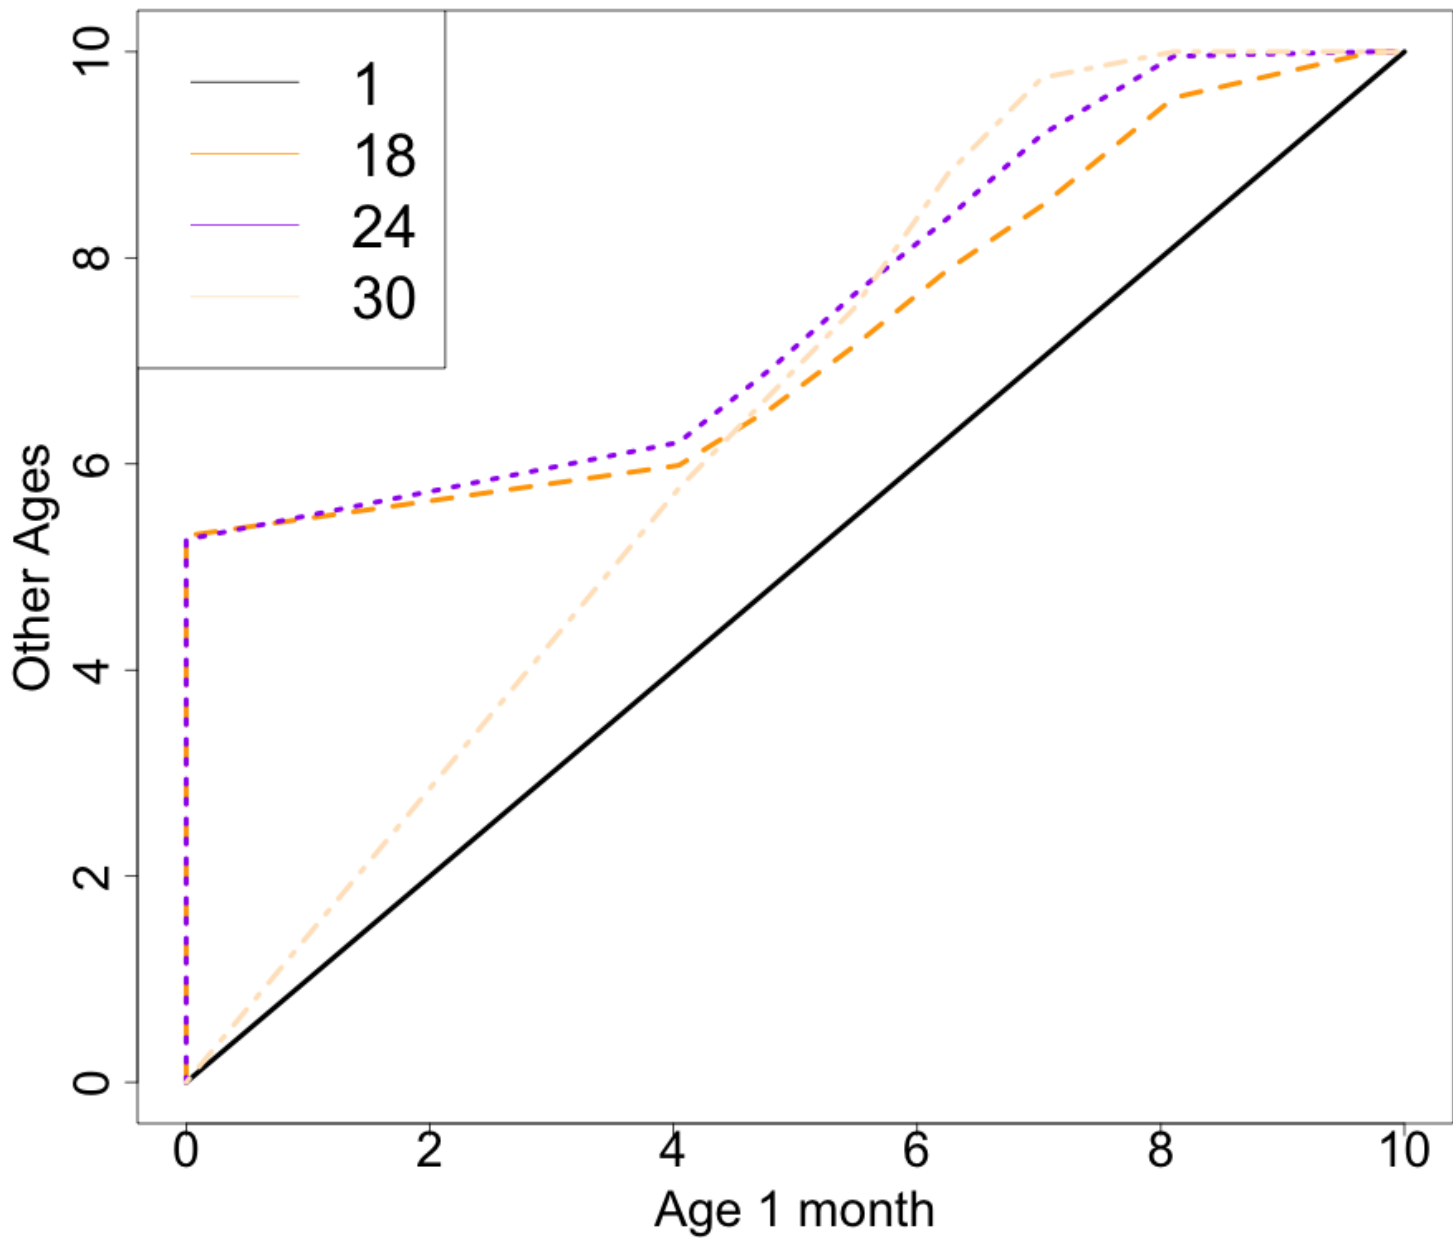

# Tnfsf9(Limb\_Muscle)

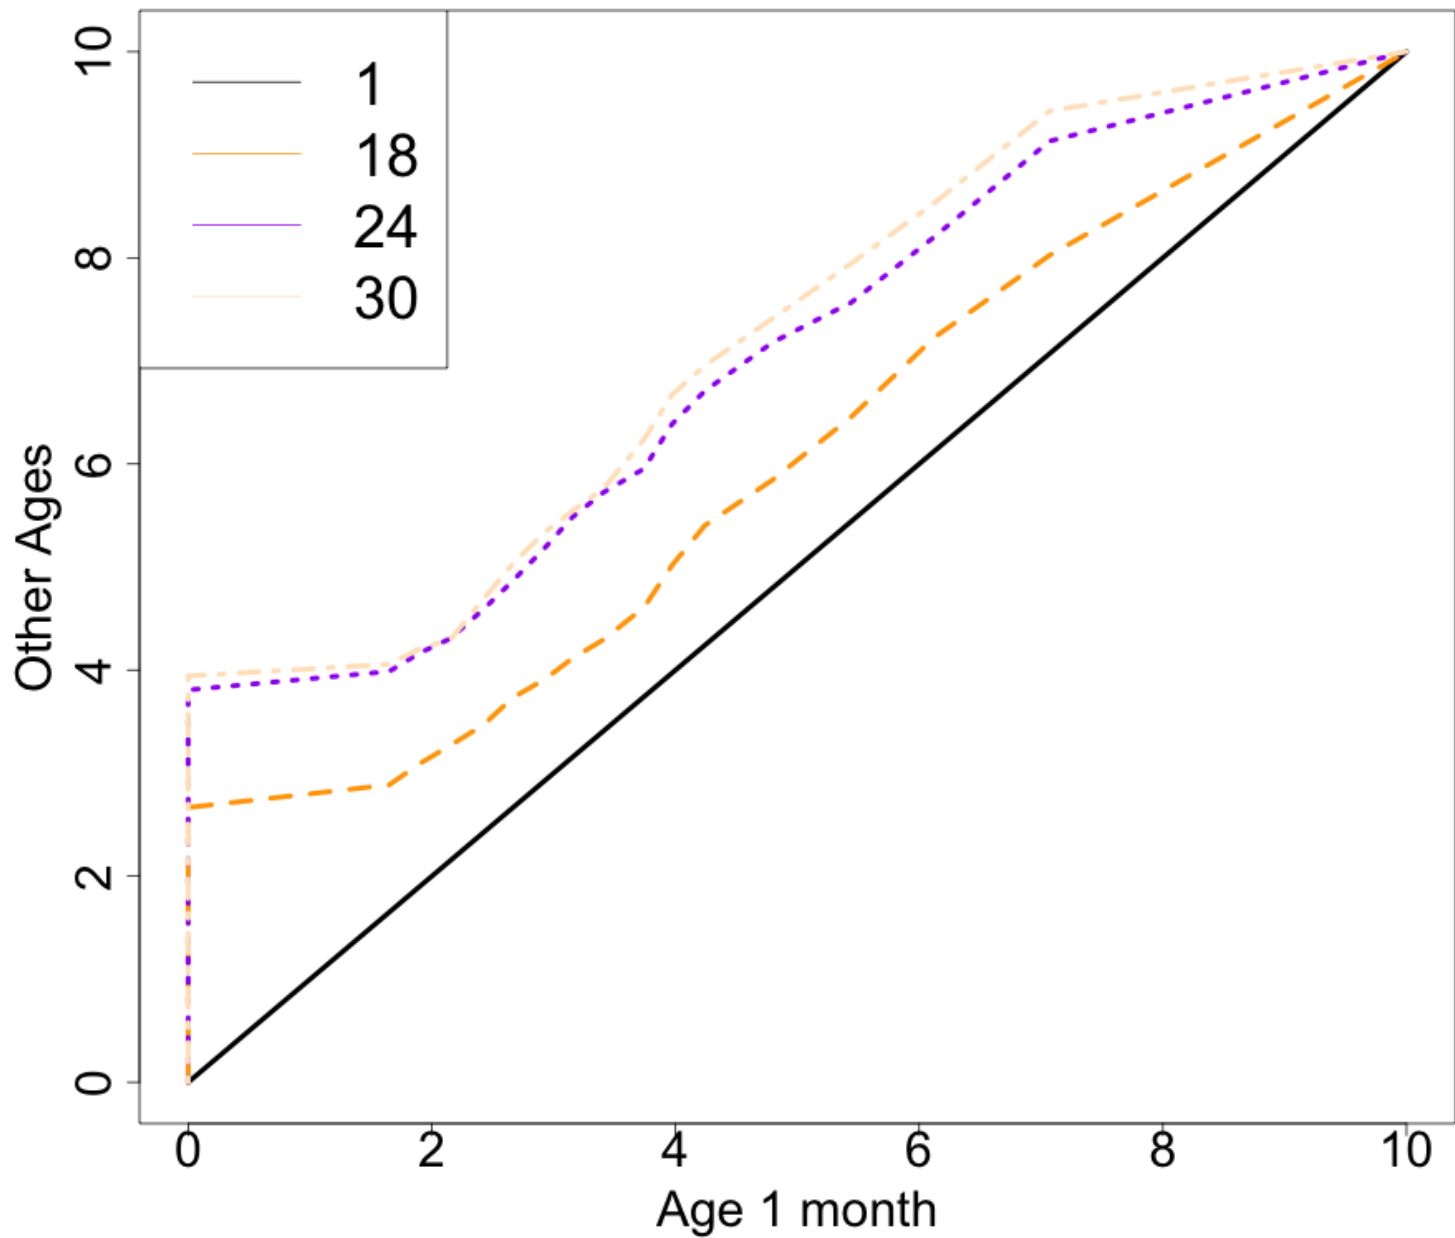

# Wisp1(Limb\_Muscle)

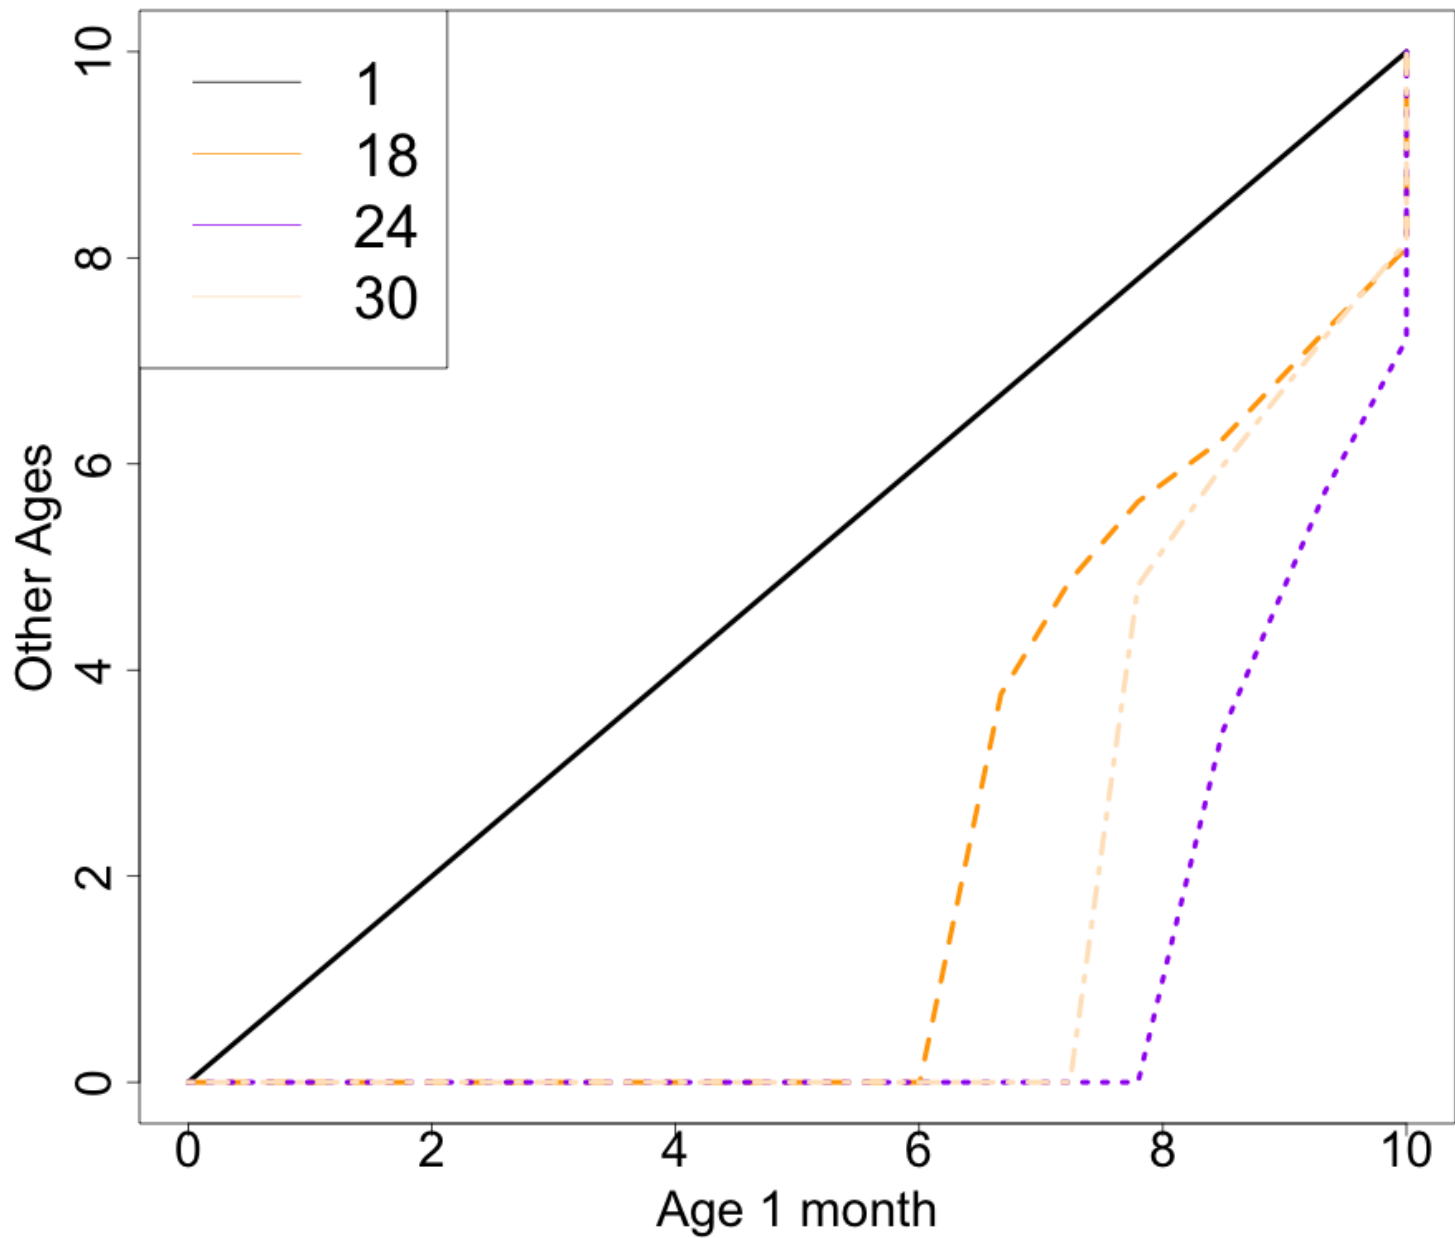

Supplement: supp4.pdf [file supp4.pdf]
