# Supplementary material for: Data-driven detection of age-related arbitrary monotonic changes in single-cell gene expression distributions
Source: PeerJ journal article supplement (doi:10.7717/peerj.16851), 2024-02-08

**(A)**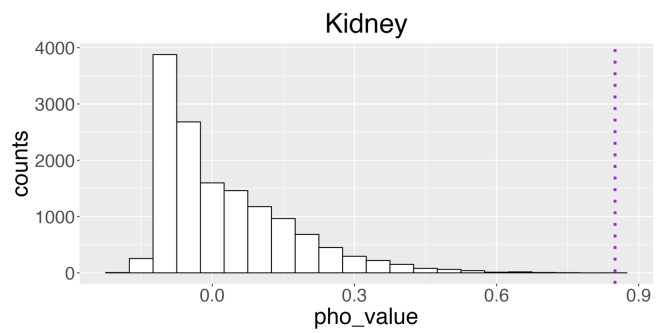**(B)**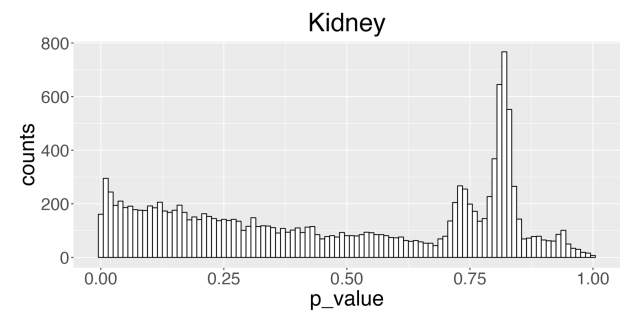**(C)**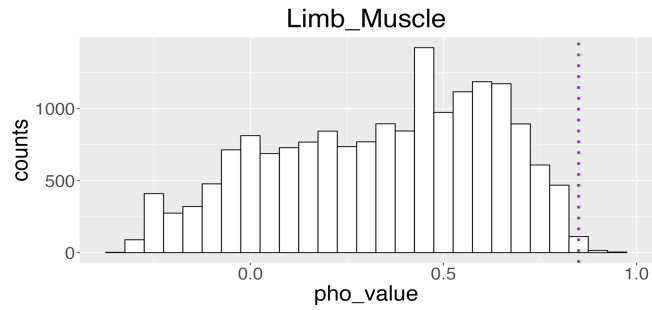**(D)**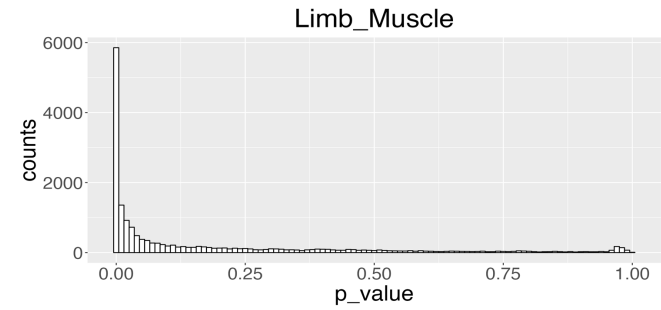**(E)**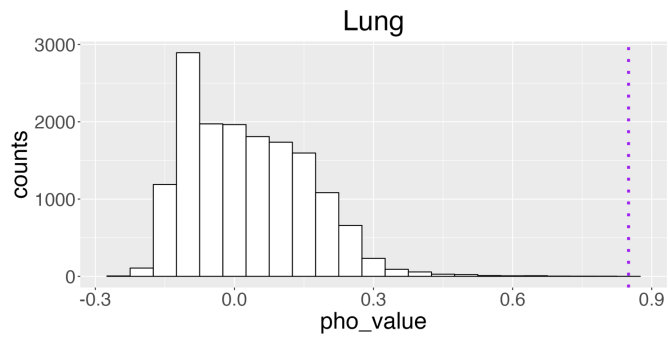**(F)**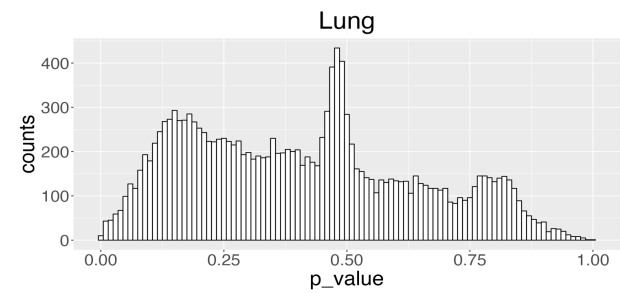**(G)**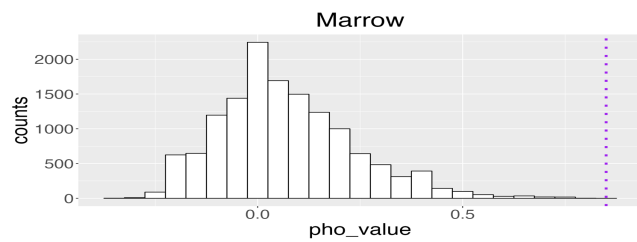**(H)**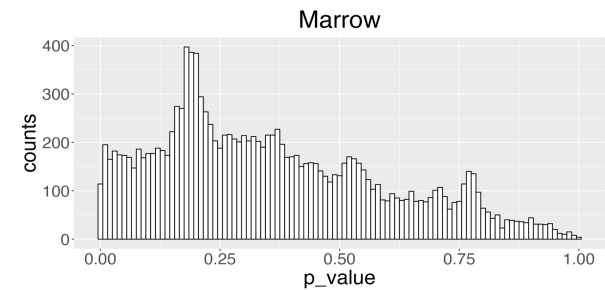

Supplement: supp5.pdf [file supp5.pdf]
