# Supplementary material for: Data-driven detection of age-related arbitrary monotonic changes in single-cell gene expression distributions
Source: PeerJ. 2024 Feb 8;12:e16851. doi: 10.7717/peerj.16851 (PMC10859082; doi:10.7717/peerj.16851)
Supplement: Supplemental Information 6 [file peerj-12-16851-s006.xlsx]

## Sheet: Sheet1
Tissue	Cell type	Gene	Coefficent
limb muscle	mesenchymal stem cell	Gpm6b	0.924
limb muscle	mesenchymal stem cell	Pltp	0.913
limb muscle	mesenchymal stem cell	Enpp4	0.907
limb muscle	mesenchymal stem cell	Foxc1	0.898
limb muscle	mesenchymal stem cell	Plau	0.89
limb muscle	mesenchymal stem cell	Arpc3	0.885
limb muscle	mesenchymal stem cell	Cfh	0.885
limb muscle	mesenchymal stem cell	Ccl11	0.883
limb muscle	mesenchymal stem cell	Adamts4	0.879
limb muscle	mesenchymal stem cell	Grb10	0.875
limb muscle	mesenchymal stem cell	Trim30a	0.874
limb muscle	mesenchymal stem cell	H2-D1	0.872
limb muscle	mesenchymal stem cell	Psmb8	0.868
limb muscle	mesenchymal stem cell	Sept4	0.876
limb muscle	mesenchymal stem cell	Plac9	0.866
limb muscle	mesenchymal stem cell	Tnfaip2	0.862
limb muscle	mesenchymal stem cell	Golt1b	0.861
limb muscle	mesenchymal stem cell	Abca8b	0.86
limb muscle	mesenchymal stem cell	Col5a	0.86
limb muscle	mesenchymal stem cell	Eif4g1	0.858
limb muscle	mesenchymal stem cell	Mpzl1	0.852
